# Supplementary material for: Nanostructured MnOx/g-C3N4 for photodegradation of sulfamethoxazole under visible light irradiation
Source: Royal Society of Chemistry journal article supplement (doi:10.1039/d4ra05996d), 2024-01-01
Supplement: d4ra05996d1.pdf [file d4ra05996d1.pdf]

Electronic Supplementary Material

**Nanostructured MnO<sub>x</sub>/g-C<sub>3</sub>N<sub>4</sub> for photodegradation of Sulfamethoxazole under visible light irradiation**

Oanh T. K. Nguyen<sup>a</sup>, Vinh Huu Nguyen<sup>a</sup>, Nong Xuan Linh<sup>a</sup>, Minh Que Doan<sup>a</sup>, Lan-Anh T.

Hoang<sup>b</sup>, Taeyoon Lee<sup>b,\*</sup>, Trinh Duy Nguyen<sup>a,\*</sup>

<sup>a</sup>Institute of Applied Technology and Sustainable Development, Nguyen Tat Thanh University, Ho Chi Minh City, Viet Nam

<sup>b</sup>Department of Environmental Engineering, College of Environmental and Marine, Pukyong National University, 45 Yongso-ro, Nam-gu, Busan 48513, Republic of Korea

Corresponding author: ndtrinh@ntt.edu.vn (T.D. Nguyen); badger74w@pknu.ac.kr (T. Lee)

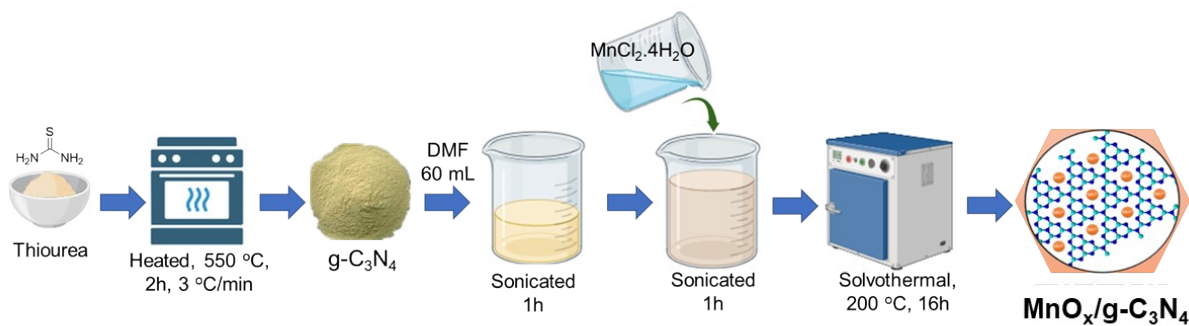

**Figure S1.** Schematic diagram of the synthesis of Mn modified on the CN.

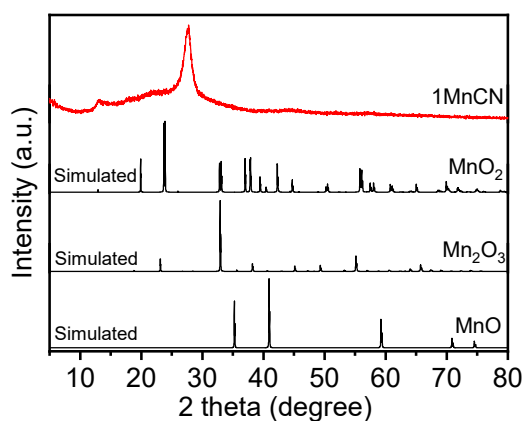

**Figure S2.** XRD pattern of the 1MnCN sample and simulated samples (from the Crystallography Open Database) of MnO, MnO<sub>2</sub>, and Mn<sub>2</sub>O<sub>3</sub>.

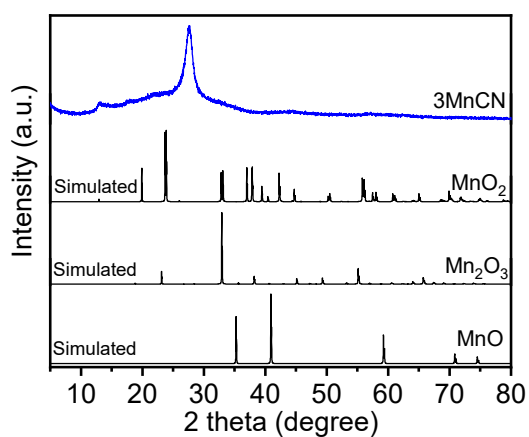

**Figure S3.** XRD pattern of the 3MnCN sample and simulated samples (from the Crystallography Open Database) of MnO, MnO<sub>2</sub>, and Mn<sub>2</sub>O<sub>3</sub>.

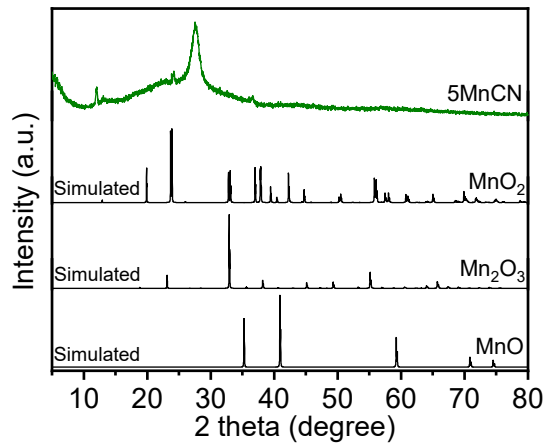

**Figure S4.** XRD pattern of the 5MnCN sample and simulated samples (from the Crystallography Open Database) of MnO, MnO<sub>2</sub>, and Mn<sub>2</sub>O<sub>3</sub>.

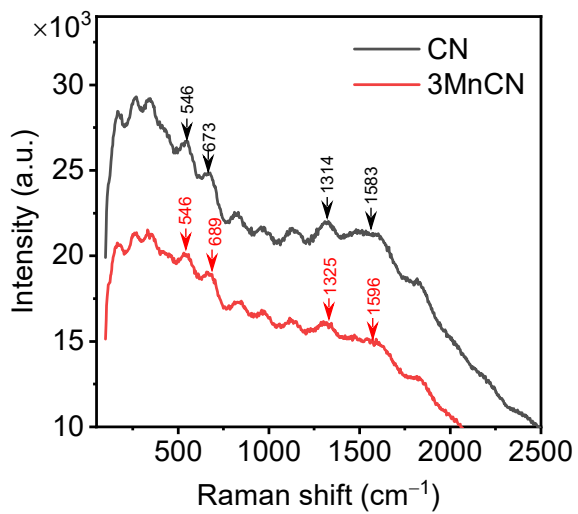

**Figure S5.** Raman spectroscopy of CN and 3MnCN samples.

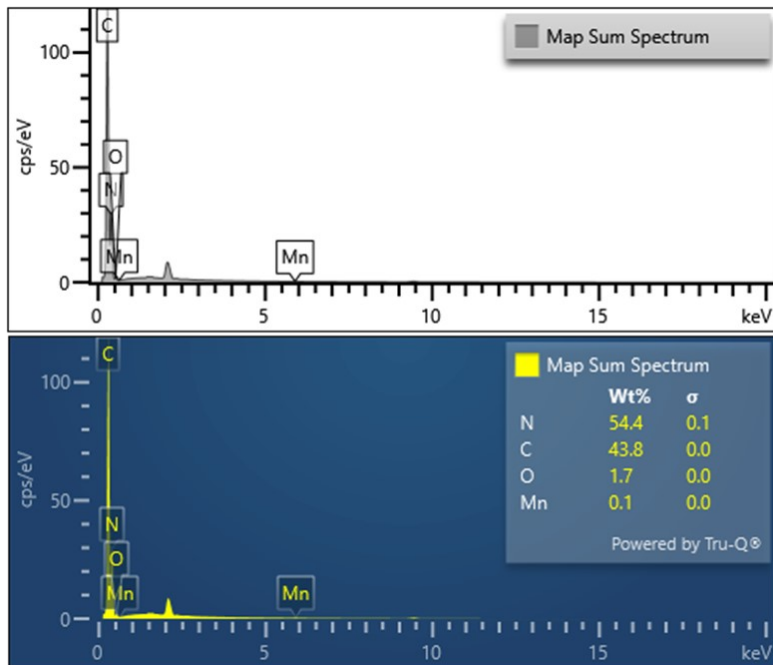

**Figure S6.** EDX analysis of the synthesized 3MnCN.

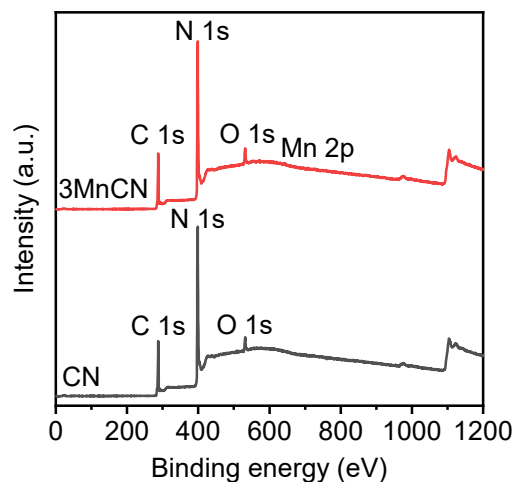

**Figure S7.** Survey XPS of CN and 3MnCN.

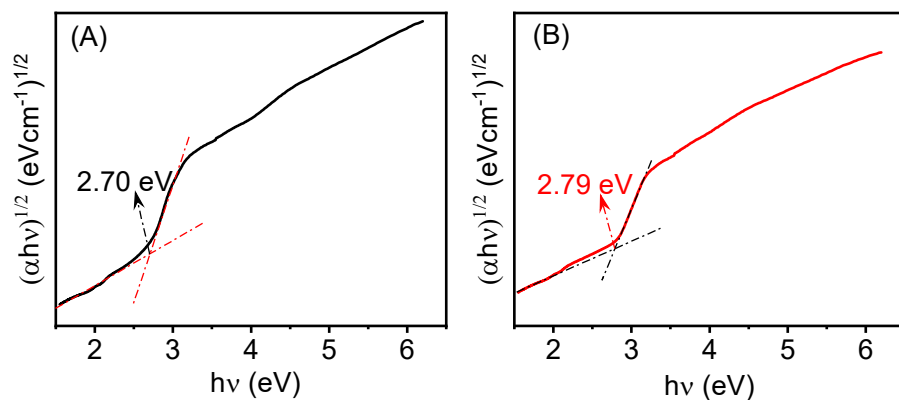

**Figure S8.** Bandgap energy of CN (A) and 3MnCN (B)

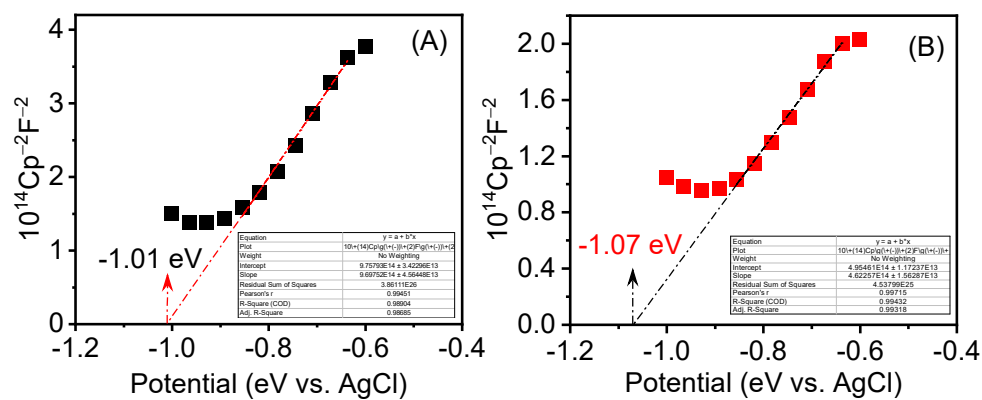

**Figure S9.** Mott-Schottky plots of the CN (A) and 3MnCN (B) samples.

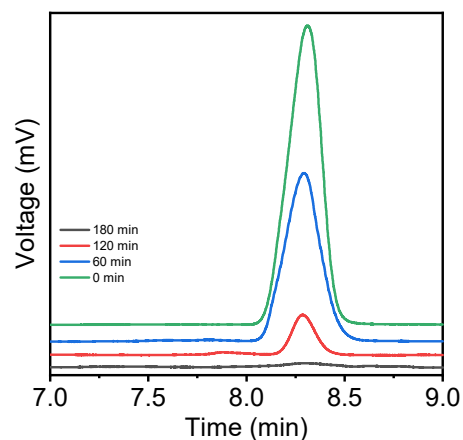

**Figure S10.** HPLC results of SMX photodegradation catalyzed by the 3MnCN after 180 minutes of irradiation.

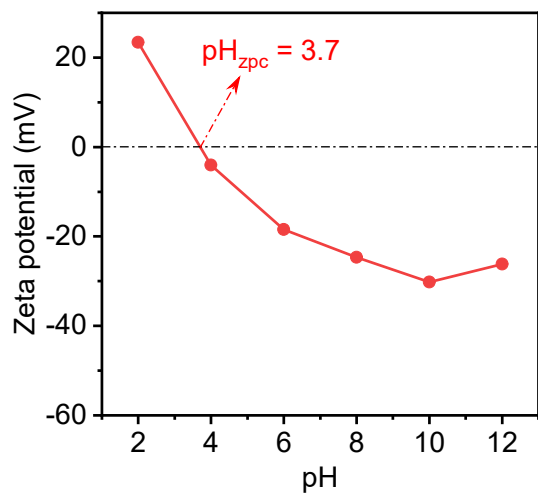

**Figure S11.** Zeta potential at different pH of the as-synthesized 3MnCN.

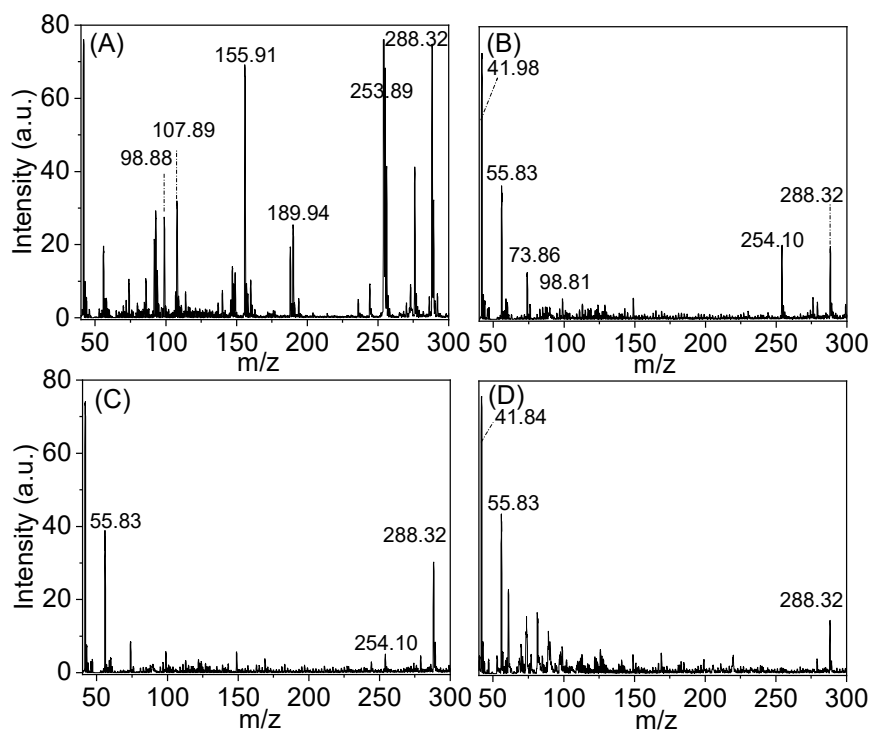

**Figure S12.** LC-MS spectra of the (A) initial SMX solution and (B) – (D) degradation intermediate products by the 3MnCN photocatalyst at different photodegradation time points.

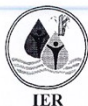

Số/Code: IER-N2409.0446/1

## BẢNG KẾT QUẢ PHÂN TÍCH ANALYSIS RESULTS

Tên khách hàng : **NGUYỄN THỊ KIM OANH**  
Customer's name : **NGUYEN THI KIM OANH**  
Tên mẫu : 3MnCN – Before  
Name of sample : 3MnCN – Before  
Mô tả mẫu : Mẫu được chứa trong ống nhựa  
Described sample : Sample is contained in centrifuge tube  
Đơn vị lấy mẫu : Khách hàng gửi mẫu  
Sampling Agency : Sampled by Customer  
Ngày lấy mẫu : 19.09.2024  
Sampling date:  
Ngày gửi mẫu : 19.09.2024  
Date of receipting:

| TT No. | THÔNG SỐ PHÂN TÍCH PARAMETERS    | ĐƠN VỊ UNITS | KẾT QUẢ RESULTS | GIỚI HẠN PHÁT HIỆN LOD | TIÊU CHUẨN SO SÁNH STANDARD VALUES <sup>(a)</sup> | PHƯƠNG PHÁP THỬ ANALYSE METHODS |
|--------|----------------------------------|--------------|-----------------|------------------------|---------------------------------------------------|---------------------------------|
| 1.     | Mangan (Mn)<br>Manganese (as Mn) | g/kg         | 1,131           | -                      | -                                                 | SMEWW 3111B:2017                |

### Ghi chú/ Notes:

- Giấy chứng nhận đủ điều kiện hoạt động dịch vụ quan trắc môi trường số hiệu: VIMCERTS 138 (GCN số 04/GCN-BTNMT)/The Certificate of eligible for service activities in environmental monitoring, code: VIMCERTS 138.
- Các kết quả phân tích chỉ có giá trị trên mẫu thử /The results are valid only on the tested sample.
- Thông tin tên khách hàng và tên mẫu thử được ghi trên phiếu kết quả này theo yêu cầu của khách hàng/ Customer's name and sample information are provided by customer.
- KPH: Không phát hiện/ KPH: Non-detectable, LOD: Giới hạn phát hiện/LOD: Limit of detection.
- Dấu (-): Không chứa giá trị, thông tin/Items with remark (-): Not available or No information.
- <sup>(a)</sup> Khách hàng không yêu cầu quy chuẩn so sánh/ Customers do not require standards.

Đại diện nhóm phân tích  
Representative of Test Group

  
Nguyễn Văn Sang

Phụ trách PTN. CLMT  
The lab's administrator

  
ThS. Nguyễn Thành Trung

Ho Chi Minh City, 27/09/2024  
Viện Trưởng  
Director  
  
GS.TS Lê Thanh Hải

Figure S13. Result of ICP-MS analysis of 3MnCN before.



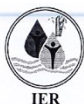

Số/Code: IER-N2409.0446/2

## BẢNG KẾT QUẢ PHÂN TÍCH ANALYSIS RESULTS

Tên khách hàng : **NGUYỄN THỊ KIM OANH**  
Customer's name : **NGUYEN THI KIM OANH**  
Tên mẫu : 3MnCN – After  
Name of sample : **3MnCN – After**  
Mô tả mẫu : Mẫu được chứa trong ống nhựa  
Described sample : **Sample is contained in centrifuge tube**  
Đơn vị lấy mẫu : Khách hàng gửi mẫu  
Sampling Agency : **Sampled by Customer**  
Ngày lấy mẫu : 19.09.2024  
Sampling date:  
Ngày gửi mẫu : 19.09.2024  
Date of receiving:

| TT No. | THÔNG SỐ PHÂN TÍCH PARAMETERS    | ĐƠN VỊ UNITS | KẾT QUẢ RESULTS | GIỚI HẠN PHÁT HIỆN LOD | TIÊU CHUẨN SO SÁNH STANDARD VALUES <sup>(a)</sup> | PHƯƠNG PHÁP THỬ ANALYSE METHODS |
|--------|----------------------------------|--------------|-----------------|------------------------|---------------------------------------------------|---------------------------------|
| 1.     | Mangan (Mn)<br>Manganese (as Mn) | g/kg         | 1,128           | -                      | -                                                 | SMEWW 3111B:2017                |

### Ghi chú/ Note:

- Giấy chứng nhận đủ điều kiện hoạt động dịch vụ quan trắc môi trường số hiệu: VIMCERTS 138 (GCN số 04/GCN-BTNMT)/The Certificate of eligible for service activities in environmental monitoring, code: VIMCERTS 138.
- Các kết quả phân tích chỉ có giá trị trên mẫu thử /The results are valid only on the tested sample.
- Thông tin tên khách hàng và tên mẫu thử được ghi trên phiếu kết quả này theo yêu cầu của khách hàng/ Customer's name and sample information are provided by customer.
- KPH: Không phát hiện/ KPH: Non-detectable, LOD: Giới hạn phát hiện/LOD: Limit of detection.
- Dấu (-): Không chứa giá trị, thông tin/Items with remark (-): Not available or No information.
- <sup>(a)</sup> Khách hàng không yêu cầu quy chuẩn so sánh/ Customers do not require standards.

Đại diện nhóm phân tích  
Representative of Test Group

Nguyễn Văn Sang

Phụ trách PTN. CLMT  
The lab's administrator

ThS. Nguyễn Thành Trung

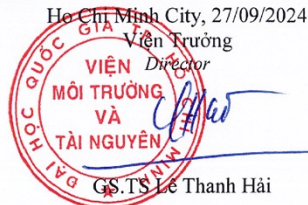

Figure S14. Result of ICP-MS analysis of 3MnCN after.



**Table S1.** SEM-EDS mapping and surface elemental composition (XPS) of 3MnCN; BET surface areas, pore volume, and average pore of CN and 3MnCN; Band gap energy ( $E_g$ ) and reaction rate constant ( $k$ ) of CN, 1MnCN, 3MnCN, and 5MnCN.

| Samples | % wt. Mn |     | $S_{BET}$<br>( $m^2/g$ ) | Pore<br>volume<br>( $\times 10^{-3}$<br>$cm^3/g$ ) | Average<br>pore<br>width<br>(nm) | $E_g$<br>(eV) | CB/VB      | $k$<br>( $10^{-3}$<br>$min^{-1}$ ) | $R^2$  |
|---------|----------|-----|--------------------------|----------------------------------------------------|----------------------------------|---------------|------------|------------------------------------|--------|
|         | EDS      | XPS |                          |                                                    |                                  |               |            |                                    |        |
| CN      | -        | -   | 44                       | 79                                                 | 7.1                              | 2.42          | -0.29/2.13 | 0.5                                | 0.9361 |
| 1MnCN   | -        | -   | -                        | -                                                  | -                                | 2.45          | -          | 2.6                                | 0.9979 |
| 3MnCN   | 0.1      | 0.1 | 8                        | 17                                                 | 8.3                              | 2.39          | -0.06/2.33 | 3.5                                | 0.9961 |
| 5MnCN   | -        | -   | -                        | -                                                  | -                                | 2.49          | -          | 2.1                                | 0.9984 |

**Table S2.** Surface elemental compositions of the catalysts.

| Catalyst (Sample) | $Mn^{2+}$ (%) | $Mn^{3+}$ (%) | $Mn^{4+}$ (%) |
|-------------------|---------------|---------------|---------------|
| 3MnCN             | 26.4          | 35.8          | 37.8          |

**Table S3.** Raw data for control experiments assessing the degradation of the SMX antibiotic using other MnO<sub>x</sub> modified g-C<sub>3</sub>N<sub>4</sub> samples. Experimental conditions: [SMX]<sub>0</sub> = 15 mg L<sup>-1</sup>, [catalyst]<sub>0</sub> = 20 mg, pH = 5, V = 100 mL, light source: 40 W white LED lamp. C and C<sub>0</sub> (mol L<sup>-1</sup>) represent the concentrations of SMX at the current time (t min) and the initial time (0 min), respectively. The standard deviation (σ) was calculated based on data from three samples

| Sample | Time (min) | C/C <sub>0</sub> ± σ | -ln(C/C <sub>0</sub> ) |
|--------|------------|----------------------|------------------------|
| CN     | -60        | 1 ± 0                | --                     |
|        | 0          | 1.04123 ± 0.01324    | 0                      |
|        | 60         | 1.07134 ± 0.0121     | -0.02853               |
|        | 120        | 1.03451 ± 0.00745    | 0.00642                |
|        | 180        | 1.06063 ± 0.02022    | -0.01836               |
|        | 240        | 1.04053 ± 0.02317    | 8.39682E-4             |
|        | 1MnCN      | -60                  | 1 ± 0                  |
| 0      |            | 1.04395 ± 0.0764     | 0                      |
| 60     |            | 0.8274 ± 0.03946     | 0.24359                |
| 120    |            | 0.59861 ± 0.02933    | 0.56733                |
| 180    |            | 0.37225 ± 0.02065    | 1.04268                |
| 240    |            | 0.24986 ± 0.01619    | 1.4419                 |
| 3MnCN  |            | -60                  | 1 ± 0                  |
|        | 0          | 1.03292 ± 0.03091    | 0                      |
|        | 60         | 0.47588 ± 0.04655    | 0.77938                |
|        | 120        | 0.23014 ± 0.02011    | 1.50486                |
|        | 180        | 0.17858 ± 0.01916    | 1.76016                |
|        | 240        | 0.15418 ± 0.00759    | 1.9028                 |
|        | 5MnCN      | -60                  | 1 ± 0                  |
| 0      |            | 1.13153 ± 0.03498    | 0                      |
| 60     |            | 0.97626 ± 0.03137    | 0.14762                |
| 120    |            | 0.81096 ± 0.02225    | 0.33301                |
| 180    |            | 0.63663 ± 0.04697    | 0.57747                |
| 240    |            | 0.48044 ± 0.05854    | 0.86393                |

**Table S4.** Raw data for control experiments assessing the degradation of the SMX antibiotic at other pH conditions using 3MnCN catalyst. Experimental conditions: [SMX]<sub>0</sub> = 15 mg L<sup>-1</sup>, [catalyst]<sub>0</sub> = 20 mg, V = 100 mL, light source: 40 W white LED lamp. C and C<sub>0</sub> (mol L<sup>-1</sup>) represent the concentrations of SMX at the current time (t min) and the initial time (0 min), respectively. The standard deviation (σ) was calculated based on data from three samples.

| Sample | Time (min) | C/C <sub>0</sub> ± σ | -ln(C/C <sub>0</sub> ) |
|--------|------------|----------------------|------------------------|
| pH = 9 | -60        | 1 ± 0                | --                     |
|        | 0          | 0.988051 ± 0.06767   | 0                      |
|        | 60         | 0.858807 ± 0.055803  | 0.139946               |
|        | 120        | 0.798238 ± 0.067208  | 0.214467               |
|        | 180        | 0.739968 ± 0.049053  | 0.288979               |
|        | 240        | 0.701295 ± 0.049817  | 0.343025               |
| pH = 7 | -60        | 1 ± 0                | --                     |
|        | 0          | 1.007844 ± 0.05461   | 0                      |
|        | 60         | 0.907956 ± 0.043681  | 0.104092               |
|        | 120        | 0.820211 ± 0.018275  | 0.20479                |
|        | 180        | 0.72055 ± 0.020963   | 0.334513               |
|        | 240        | 0.632697 ± 0.066846  | 0.469528               |
| PH = 5 | -60        | 1 ± 0                | --                     |
|        | 0          | 1.032923 ± 0.030906  | 0                      |
|        | 60         | 0.475878 ± 0.04655   | 0.779377               |
|        | 120        | 0.230144 ± 0.020108  | 1.504856               |
|        | 180        | 0.178582 ± 0.019163  | 1.760155               |
|        | 240        | 0.154178 ± 0.007591  | 1.902802               |
| pH = 3 | -60        | 1 ± 0                | --                     |
|        | 0          | 1.086844 ± 0.077185  | 0                      |
|        | 60         | 0.725153 ± 0.029288  | 0.402997               |
|        | 120        | 0.411477 ± 0.043006  | 0.974404               |
|        | 180        | 0.308843 ± 0.034709  | 1.261838               |
|        | 240        | 0.270841 ± 0.015516  | 1.388666               |

**Table S5.** Raw data for control experiments assessing the degradation of the SMX antibiotic with other photocatalytic doses using 3MnCN sample. Experimental conditions:  $[\text{SMX}]_0 = 15 \text{ mg L}^{-1}$ ,  $V = 100 \text{ mL}$ , light source: 40 W white LED lamp.  $C$  and  $C_0$  ( $\text{mol L}^{-1}$ ) represent the concentrations of SMX at the current time ( $t$  min) and the initial time (0 min), respectively. The standard deviation ( $\sigma$ ) was calculated based on data from three samples

| Sample      | Time (min) | $C/C_0 \pm \sigma$      | $-\ln(C/C_0)$ |
|-------------|------------|-------------------------|---------------|
| No catalyst | -60        | $1 \pm 0$               | --            |
|             | 0          | $0.979092 \pm 0.026516$ | 0             |
|             | 60         | $1.0002 \pm 0.006777$   | -0.02168      |
|             | 120        | $0.985879 \pm 0.000769$ | -0.00728      |
|             | 180        | $0.98424 \pm 0.015453$  | -0.00549      |
|             | 240        | $0.985099 \pm 0.017033$ | -0.00634      |
|             | 10 mg      | -60                     | $1 \pm 0$     |
| 0           |            | $1.06178 \pm 0.03047$   | 0             |
| 60          |            | $0.88256 \pm 0.02483$   | 0.18486       |
| 120         |            | $0.72431 \pm 0.03797$   | 0.38345       |
| 180         |            | $0.58521 \pm 0.05225$   | 0.59925       |
| 240         |            | $0.45554 \pm 0.05394$   | 0.85272       |
| 20 mg       |            | -60                     | $1 \pm 0$     |
|             | 0          | $1.03292 \pm 0.03091$   | 0             |
|             | 60         | $0.47588 \pm 0.04655$   | 0.77938       |
|             | 120        | $0.23014 \pm 0.02011$   | 1.50486       |
|             | 180        | $0.17858 \pm 0.01916$   | 1.76016       |
|             | 240        | $0.15418 \pm 0.00759$   | 1.9028        |
|             | 30 mg      | -60                     | $1 \pm 0$     |
| 0           |            | $1.01288 \pm 0.02224$   | 0             |
| 60          |            | $0.80374 \pm 0.02187$   | 0.2314        |
| 120         |            | $0.54174 \pm 0.03266$   | 0.6274        |
| 180         |            | $0.37104 \pm 0.0676$    | 1.02067       |
| 240         |            | $0.28552 \pm 0.04315$   | 1.27679       |

**Table S6.** Raw data for scavenger trapping experiments assessing the degradation of the SMX antibiotic using 3MnCN sample. Experimental conditions:  $[\text{SMX}]_0 = 15 \text{ mg L}^{-1}$ ,  $[\text{catalyst}]_0 = 20 \text{ mg}$ ,  $\text{pH} = 5$ ,  $V = 100 \text{ mL}$ , light source: 40 W white LED lamp. C and  $C_0$  ( $\text{mol L}^{-1}$ ) represent the concentrations of SMX at the current time (t min) and the initial time (0 min), respectively. The standard deviation ( $\sigma$ ) was calculated based on data from three samples

| Scavenger                         | Time (min) | $C/C_0 \pm \sigma$      | Scavenger | Time (min) | $C/C_0 \pm \sigma$    |
|-----------------------------------|------------|-------------------------|-----------|------------|-----------------------|
| $\text{K}_2\text{Cr}_2\text{O}_7$ | -60        | $1 \pm 0$               | TBA       | -60        | 1                     |
|                                   | 0          | $0.979227 \pm 0.041439$ |           | 0          | $1.0427 \ 0.017849$   |
|                                   | 60         | $0.901536 \pm 0.032514$ |           | 60         | $0.63046 \ 0.05273$   |
|                                   | 120        | $0.908846 \pm 0.034115$ |           | 120        | $0.337111 \ 0.054284$ |
|                                   | 180        | $0.871698 \pm 0.035059$ |           | 180        | $0.262858 \ 0.032863$ |
|                                   | 240        | $0.810111 \pm 0.046817$ |           | 240        | $0.234774 \ 0.03058$  |
| $\text{Na}_2\text{C}_2\text{O}_4$ | -60        | $1 \pm 0$               | BQ        | -60        | 1                     |
|                                   | 0          | $1.083876 \pm 0.012506$ |           | 0          | $0.995192 \ 0.036679$ |
|                                   | 60         | $0.627045 \pm 0.004858$ |           | 60         | $1.104673 \ 0.052611$ |
|                                   | 120        | $0.34797 \pm 0.023054$  |           | 120        | $1.097346 \ 0.071742$ |
|                                   | 180        | $0.247658 \pm 0.019485$ |           | 180        | $1.122792 \ 0.099219$ |
|                                   | 240        | $0.215765 \pm 0.026142$ |           | 240        | $1.142558 \ 0.104452$ |

**Table S7.** Toxicity of SMX and its intermediates using the ECOSAR program<sup>a</sup>.

| Compounds | m/z | Acute toxicity (mg. L <sup>-1</sup> ) |                             |                                 | Chronic toxicity (mg. L <sup>-1</sup> ) |               |                   | Hazard category |
|-----------|-----|---------------------------------------|-----------------------------|---------------------------------|-----------------------------------------|---------------|-------------------|-----------------|
|           |     | Fish (LC <sub>50</sub> )              | Daphnid (LC <sub>50</sub> ) | Green Algae (EC <sub>50</sub> ) | Fish (ChV)                              | Daphnid (ChV) | Green Algae (ChV) |                 |
| SMX       | 253 | 893.69                                | 2.10                        | 9.24                            | 1.10                                    | 0.13          | 13.96             | Toxic           |
| P1        | 288 | 8446.54                               | 2.21                        | 20.22                           | 4.87                                    | 0.333         | 26.68             | Toxic           |
| P2        | 190 | 5822.62                               | 14.96                       | 262.29                          | 1473.69                                 | 5.08          | 229.05            | Harmful         |
| P3        | 99  | 443.43                                | 0.74                        | 3.64                            | 2.59                                    | 0.05          | 5.38              | Harmful         |
| P4        | 156 | 18.21                                 | 179.06                      | -                               | 10.93                                   | 69.33         | 0.62              | Harmful         |
| P5        | 109 | 4.81                                  | 0.55                        | 94.01                           | 0.62                                    | 0.07          | 25.66             | Toxic           |
| P6        | 56  | -                                     | -                           | -                               | -                                       | -             | -                 | Harmful         |
| P7        | 42  | 67.23                                 | 37.06                       | 24.41                           | 6.34                                    | 3.33          | 5.98              | Harmful         |
| P8        | 74  | 255.91                                | 2252.58                     | 1591.09                         | 147.85                                  | 172.85        | 272.59            | Not Harmful     |

<sup>a</sup>The predicted toxicity values are classified according to the system established by the Globally Harmonized System of Classification and Labelling of Chemicals (GHS) (United Nations, 2011). Not harmful: LC<sub>50</sub>/EC<sub>50</sub>/ChV greater than 100 mg. L<sup>-1</sup>; harmful: 10 mg. L<sup>-1</sup> < LC<sub>50</sub>/EC<sub>50</sub>/ChV < 100 mg. L<sup>-1</sup>; toxic: 1 mg. L<sup>-1</sup> < LC<sub>50</sub>/EC<sub>50</sub>/ChV < 10 mg. L<sup>-1</sup>; very toxic: LC<sub>50</sub>/EC<sub>50</sub>/ChV < 1 mg. L<sup>-1</sup>. The lowest acute toxicity values between and within the different trophic levels (fish, daphnid, and green algae) were used to define the appropriate hazard category of the compounds.

**Table S8.** Summary of the photocatalytic properties of other MnO<sub>x</sub>/g-C<sub>3</sub>N<sub>4</sub> nanostructures towards degradation of pollutants.

| Sample                                                      | Amount | Pollutants           | Concentration and Usage        | Power source              | Time    | Efficiency | Ref.      |
|-------------------------------------------------------------|--------|----------------------|--------------------------------|---------------------------|---------|------------|-----------|
| MnO <sub>x</sub> /g-C <sub>3</sub> N <sub>4</sub>           | 20 mg  | Sulfamethoxazole     | 15 mg L <sup>-1</sup> , 100 mL | White light LED lamp, 40W | 240 min | 85%        | This work |
| 2D-2D g-C <sub>3</sub> N <sub>4</sub> /MnO <sub>2</sub>     | 50 mg  | Rhodamine (RhB)      | 10 mg L <sup>-1</sup> , 50 mL  | Xenon lamp, 300 W         | 60 min  | 91.3%      | 1         |
| Mn-adsorbed g-C <sub>3</sub> N <sub>4</sub>                 | 200 mg | Rhodamine (RhB)      | 4 mg L <sup>-1</sup> , 100 mL  | Xe-lamp, 300 W            | 160 min | 99%        | 2         |
| g-C <sub>3</sub> N <sub>4</sub> -Mn-H                       | 50 mg  | Rhodamine (RhB)      | 10 mg L <sup>-1</sup> , 100 mL | Xe arc lamp, 300W         | 60 min  | 88.9%      | 3         |
| Mn-doped g-C <sub>3</sub> N <sub>4</sub> nanoribbon         | 50 mg  | Methylene Blue (MB)  | 10 mg L <sup>-1</sup> , 200 mL | Xe-lamp, 300 W            | 180 min | 96%        | 4         |
| Mn/O co-doped g-C <sub>3</sub> N <sub>4</sub>               | 20 mg  | Malachite green (MG) | 20 mg L <sup>-1</sup> , 50 mL  | Xenon lamp, 350 W         | 30 min  | 91.7%      | 5         |
| g-C <sub>3</sub> N <sub>4</sub> /diatomite/MnO <sub>2</sub> | 30 mg  | Rhodamine (RhB)      | 10 mg L <sup>-1</sup> , 100 mL | Xe lamp, 300 W            | 50 min  | 94%        | 6         |
| MnO <sub>x</sub> /g-C <sub>3</sub> N <sub>4</sub>           | 20 mg  | Methyl orange (MO)   | 20 mg L <sup>-1</sup> , 50 mL  | Xenon lamp, 300 W         | 20 min  | 94%        | 7         |
| MnO <sub>2</sub> /g-C <sub>3</sub> N <sub>4</sub>           | 50 mg  | Rhodamine (RhB)      | 20 mg L <sup>-1</sup> , 50 mL  | Xenon lamp, 300 W         | 100 min | 99%        | 8         |
| MnO <sub>2</sub> /g-C <sub>3</sub> N <sub>4</sub>           | 50 mg  | Methylene Blue (MB)  | 20 mg L <sup>-1</sup> , 100 mL | Xe lamp, 500 W            | 150 min | 94%        | 9         |



## References

- 1 P. Xia, B. Zhu, B. Cheng, J. Yu and J. Xu, *ACS Sustain. Chem. Eng.*, 2018, **6**, 965–973.
- 2 W. Zhang, Z. Zhang, S. Kwon, F. Zhang, B. Stephen, K. K. Kim, R. Jung, S. Kwon, K.-B. Chung and W. Yang, *Appl. Catal. B Environ.*, 2017, **206**, 271–281.
- 3 J.-C. Wang, C.-X. Cui, Y. Li, L. Liu, Y.-P. Zhang and W. Shi, *J. Hazard. Mater.*, 2017, **339**, 43–53.
- 4 J.-C. Wang, C.-X. Cui, Q.-Q. Kong, C.-Y. Ren, Z. Li, L. Qu, Y. Zhang and K. Jiang, *ACS Sustain. Chem. Eng.*, 2018, **6**, 8754–8761.
- 5 X. Xu, S. Wang, T. Hu, X. Yu, J. Wang and C. Jia, *Dye. Pigment.*, 2020, **175**, 108107.
- 6 R.-R. Chen, Q.-F. Ren, Y.-X. Liu, Y. Ding, H.-T. Zhu, C.-Y. Xiong, Z. Jin and W.-C. Oh, *J. Korean Ceram. Soc.*, 2021, **58**, 548–558.
- 7 W. Gong, Q. Wu, L. Ma, W. Zhang, X. Li, A. Xu and S. Zhao, *Colloids Surfaces A Physicochem. Eng. Asp.*, 2023, **659**, 130812.
- 8 K. Ahmad, A. Chaudhary, W. Raza, A. Alsulmi and H. Kim, *Opt. Mater. (Amst.)*, 2023, **140**, 113857.
- 9 M. Abdullah, S. D. Alahmari, F. F. Alharbi, S. R. Ejaz, M. S. Waheed, S. Aman, A. G. Al-Sehemi, A. M. A. Henaish, Z. Ahmad and H. M. T. Farid, *J. Mater. Sci. Mater. Electron.*, 2024, **35**, 517.
